# Supplementary material for: Associations between Body Composition and Vitamin D Status in Children with Overweight and Obesity Participating in a 1-Year Lifestyle Intervention
Source: MDPI journal article supplement (doi:10.3390/nu14153153), 2022-07-30

**Supplemental Table S1:** Characteristics of participants by tertile of adiposity indicator at baseline

|                                   |              | Tertile 1 (n=34) | Tertile 2 (n=33) | Tertile 3 (n=34) |
|-----------------------------------|--------------|------------------|------------------|------------------|
| BMI (kg/m <sup>2</sup> )          | Mean         | 23.1 ± 2.6       | 26.0 ± 3.0       | 28.8 ± 4.4       |
|                                   | Mean z-score | 2.3 ± 0.3        | 2.9 ± 0.2        | 4.0 ± 0.9        |
|                                   | Age          | 9.6 ± 2.2        | 9.5 ± 1.7        | 8.8 ± 1.8        |
|                                   | % Male       | 30.3             | 47.1             | 58.8             |
| BF (%)                            | Mean         | 33.3 ± 3.3       | 37.5 ± 2.5       | 41.5 ± 3.7       |
|                                   | Mean z-score | 0.4 ± 0.4        | 1.0 ± 0.1        | 1.6 ± 0.3        |
|                                   | Age          | 9.3 ± 2.0        | 9.9 ± 2.0        | 8.7 ± 1.7        |
|                                   | % Male       | 32.4             | 51.5             | 52.9             |
| FMI (kg/m <sup>2</sup> )          | Mean         | 8.1 ± 1.5        | 9.7 ± 1.7        | 11.7 ± 2.7       |
|                                   | Mean z-score | 1.2 ± 0.3        | 1.7 ± 0.1        | 2.2 ± 0.2        |
|                                   | Age          | 9.8 ± 2.0        | 9.5 ± 1.8        | 8.6 ± 1.8        |
|                                   | % Male       | 41.2             | 48.5             | 47.1             |
| Adjusted FMI (kg/m <sup>2</sup> ) | Mean         | 6.6 ± 1.0        | 8.3 ± 1.0        | 9.9 ± 2.0        |
|                                   | Mean z-score | 1.2 ± 0.3        | 1.7 ± 0.1        | 2.2 ± 0.3        |
|                                   | Age          | 9.6 ± 2.1        | 9.8 ± 1.8        | 8.5 ± 1.7        |
|                                   | % Male       | 41.2             | 48.5             | 47.1             |
| WC (cm)                           | Mean         | 81.1 ± 10.5      | 87.2 ± 9.9       | 93.6 ± 11.6      |
|                                   | Mean z-score | 1.7 ± 0.2        | 2.1 ± 0.1        | 2.5 ± 0.2        |
|                                   | Age          | 9.7 ± 2.1        | 9.4 ± 1.8        | 8.8 ± 1.8        |
|                                   | % Male       | 44.1             | 39.4             | 52.9             |
| Waist:height                      | Mean         | 0.57 ± 0.03      | 0.62 ± 0.02      | 0.67 ± 0.04      |
|                                   | Mean z-score | 1.6 ± 0.3        | 1.9 ± 0.1        | 2.3 ± 0.2        |
|                                   | Age          | 9.2 ± 2.1        | 9.6 ± 1.9        | 9.1 ± 1.8        |
|                                   | % Male       | 35.3             | 51.5             | 50.0             |
| Trunk:limb FM                     | Mean         | 0.54 ± 0.05      | 0.66 ± 0.05      | 0.76 ± 0.09      |
|                                   | Mean z-score | -0.7 ± 0.4       | 0.1 ± 0.2        | 0.8 ± 0.4        |
|                                   | Age          | 9.5 ± 1.9        | 9.5 ± 1.9        | 9.0 ± 1.7        |
|                                   | % Male       | 38.2             | 39.4             | 58.8             |
| LMI (kg/m <sup>2</sup> )          | Mean         | 13.9 ± 1.6       | 15.6 ± 1.4       | 16.9 ± 1.9       |
|                                   | Mean z-score | 2.1 ± 0.4        | 3.1 ± 0.2        | 4.2 ± 0.5        |
|                                   | Age          | 9.3 ± 2.1        | 9.6 ± 1.7        | 9.0 ± 2.0        |
|                                   | % Male       | 35.3             | 54.6             | 47.1             |
| Adjusted LMI (kg/m <sup>2</sup> ) | Mean         | 9.9 ± 0.5        | 11.1 ± 0.4       | 12.0 ± 0.7       |
|                                   | Mean z-score | 1.8 ± 0.4        | 2.9 ± 0.2        | 4.1 ± 0.7        |
|                                   | Age          | 9.2 ± 2.0        | 9.0 ± 2.0        | 9.7 ± 1.8        |
|                                   | %Male        | 38.2             | 51.5             | 47.1             |
|                                   |              | Android (n=51)   | Gynoid (n=50)    |                  |
| Android:Gynoid                    | Mean         | 1.1 ± 0.1        | 0.9 ± 0.1        |                  |
|                                   | Age          | 9.9 ± 1.8        | 8.7 ± 1.8        |                  |
|                                   | %Male        | 49.0             | 42.0             |                  |

Abbreviations: BMI=body mass index; BF=body fat; FMI=fat mass index; LMI=lean mass index; WC=waist circumference

**Supplement Figure S1:** Flow of participants; exclusions from final analysis

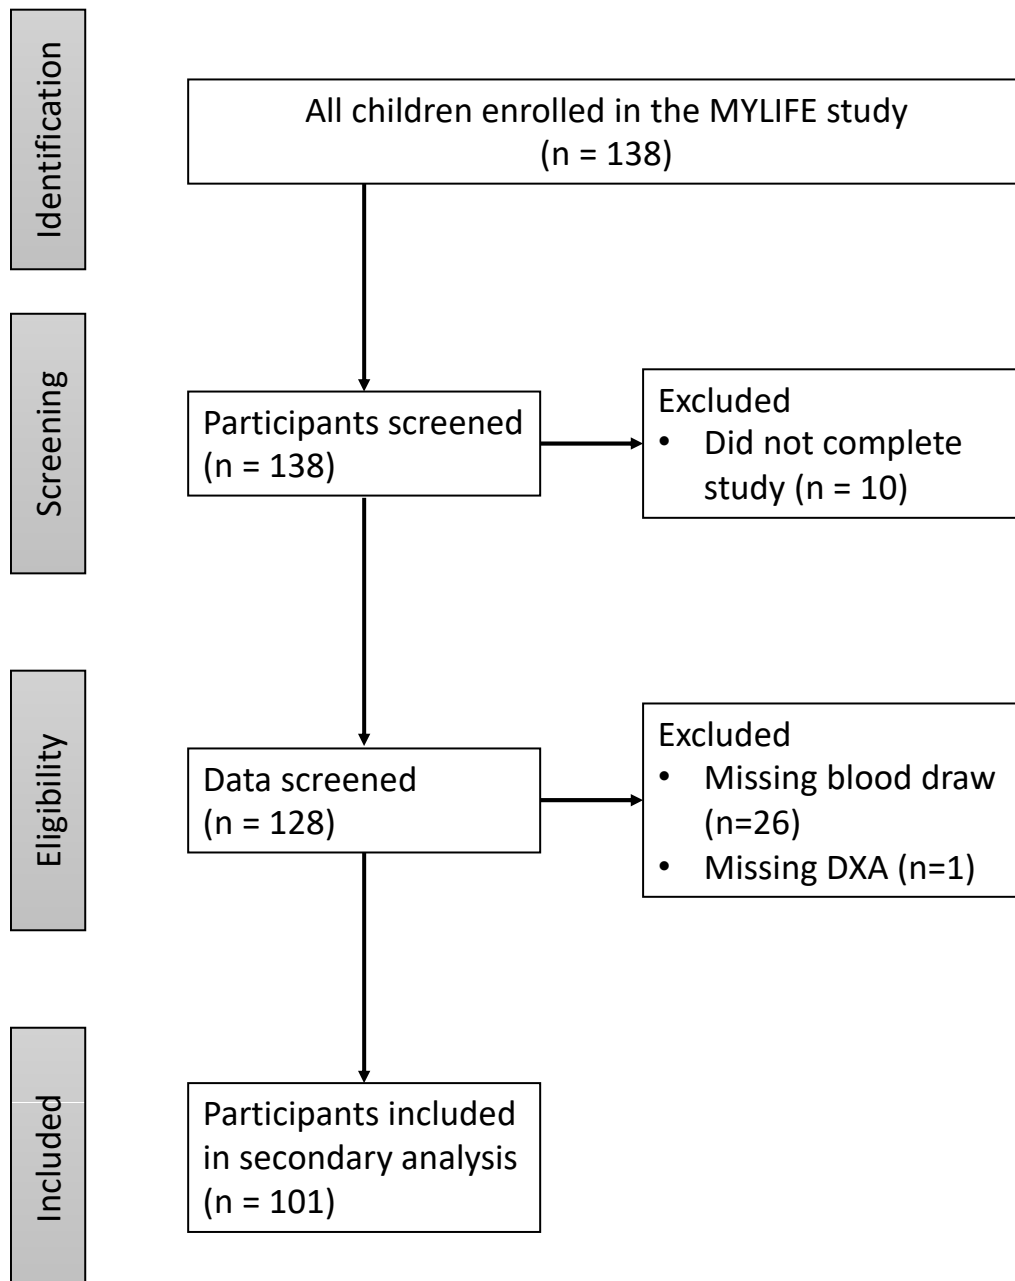

Supplement: s1 [file s1]
